# Supplementary material for: Imaging features of histological subtypes of hepatocellular carcinoma: Implication for LI-RADS
Source: PubMed Central journal article supplement — JHEP Rep. 2021 Sep 30;3(6):100380. doi: 10.1016/j.jhepr.2021.100380 (PMC8603197; doi:10.1016/j.jhepr.2021.100380), 2021-09-30
Supplement: mmc1.pdf [file mmc1.pdf]

# **Imaging features of histological subtypes of hepatocellular carcinoma: implication for LI-RADS**

Roberto Cannella, Marco Dioguardi Burgio, Aurélie Beaufrère, Loïc Trapani, Valérie Paradis,  
Christian Hobeika, Francois Cauchy, Mohamed Bouattour, Valérie Vilgrain, Riccardo  
Sartoris, Maxime Ronot.

|                        |    |
|------------------------|----|
| Table of contents      |    |
| Imaging technique..... | 2  |
| Fig. S1.....           | 3  |
| Fig. S2.....           | 4  |
| Table S1.....          | 5  |
| Table S2.....          | 7  |
| Table S3.....          | 9  |
| Table S4.....          | 12 |
| Table S5.....          | 14 |
| Table S6.....          | 17 |
| Table S7.....          | 21 |
| Table S8.....          | 24 |
| Table S9.....          | 28 |

## **IMAGING TECHNIQUE**

CT and MRI exams were acquired with different scanners due to the retrospective design of the study. Patients were intravenously administered a weight-based dose of iodinated contrast agent for contrast-enhanced CT, with an iodine concentration of 350 g/L, injected with a power injector at a rate of 3-4 ml/s. MRI exams were acquired before and after the intravenous administration of gadolinium-based contrast agent (Gd-BOPTA, Gadobenate Dimeglumine, MultiHance, Bracco Imaging, Milan, Italy; Gd-DOTA, gadoterate meglumine, Dotarem, Guerbet, Aulnay-sous-Bois, France; or occasionally other gadolinium-based extracellular contrast agents), injected with a power injector at a rate of 2 ml/s. Post-contrast phases included at least late hepatic arterial (acquired with bolus triggering technique), portal venous (70 to 90 seconds), and delayed (180 seconds) phases. Due to the retrospective study design, diffusion-weighted imaging and dual gradient-echo sequences were missing in ten and four patients, respectively. Hepatobiliary phase (HBP) images were acquired at 2 hours after the administration of Gd-BOPTA in 68 exams.

**Fig. S1. Kaplan-Meier curves for recurrence-free survival (RFS) according to hepatocellular carcinoma (HCC) main subtypes. Abbreviations:** MTM-HCC=macrotrabecular massive hepatocellular carcinoma; NOS-HCC=not otherwise specified hepatocellular carcinoma; RFS=Recurrence-free survival; SH-HCC=steatohepatitic hepatocellular carcinoma.

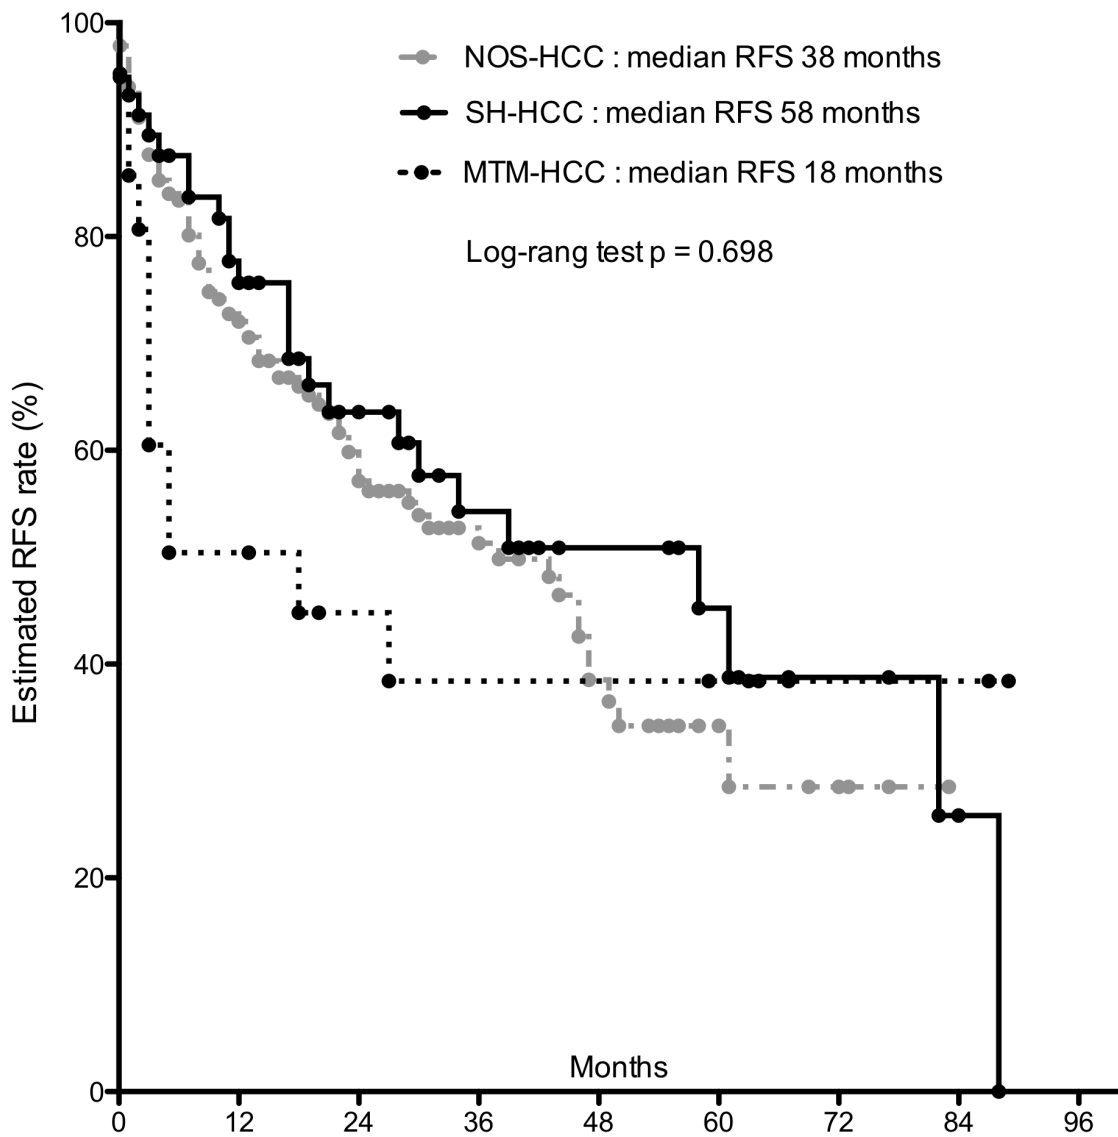

|           |     |     |    |    |    |   |   |   |   |
|-----------|-----|-----|----|----|----|---|---|---|---|
| NOS - HCC | 186 | 103 | 66 | 37 | 21 | 8 | 4 | 1 | 0 |
| SH-HCC    | 59  | 41  | 24 | 17 | 12 | 9 | 5 | 2 | 0 |
| MTM-HCC   | 21  | 12  | 8  | 7  | 7  | 6 | 3 | 2 | 0 |

**Fig. S2. Kaplan-Meier curves for overall survival (OS) according to hepatocellular carcinoma (HCC) main subtypes. Abbreviations:** MTM-HCC=macrotrabecular massive hepatocellular carcinoma; NOS-HCC=not otherwise specified hepatocellular carcinoma; OS=overall survival; SH-HCC=steatohepatic hepatocellular carcinoma.

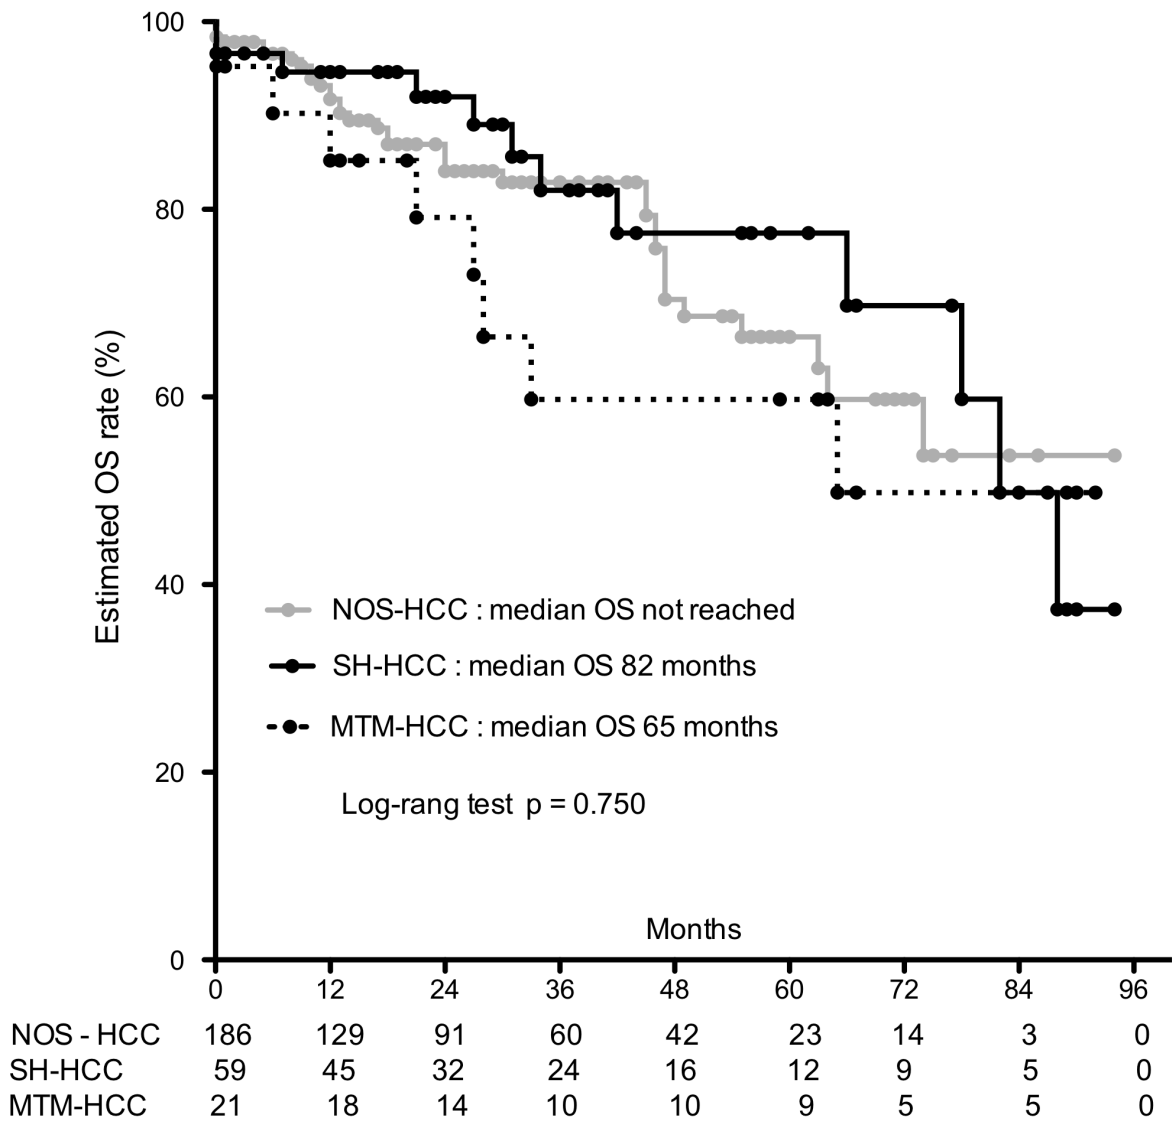

**Table S1:** Clinical and laboratory and histopathological characteristics of the patients with other hepatocellular carcinoma (HCC) subtypes.

| Characteristics                            | All       | Clear Cell HCC | Lymphocyte-rich HCC | Scirrhou HCC | Fibrolamellar HCC |
|--------------------------------------------|-----------|----------------|---------------------|--------------|-------------------|
| <i>Clinical and laboratory features</i>    |           |                |                     |              |                   |
| <b>Patients</b>                            | 12        | 5              | 4                   | 2            | 1                 |
| <b>Age (years)</b>                         | 62.5      | 60.0           | 68.5                | 70.5         | 43.0              |
| <b>Sex</b>                                 |           |                |                     |              |                   |
| Men                                        | 8 (66.7)  | 3 (60.0)       | 4 (100)             | 1 (50.0)     | 0 (0)             |
| Women                                      | 4 (33.3)  | 2 (40.0)       | 0 (0)               | 1 (50.0)     | 1 (100)           |
| <b>Age men (years)</b>                     | 64.0      | 36.0           | 68.5                | 78.0         | NA                |
| <b>Age women (years)</b>                   | 61.5      | 65.0           | NA                  | 63.0         | 43.0              |
| <b>Chronic liver disease*</b>              |           |                |                     |              |                   |
| Hepatitis C                                | 1 (8.3)   | 0 (0)          | 1 (25.0)            | 0 (0)        | 0 (0)             |
| Hepatitis B                                | 4 (33.3)  | 2 (40.0)       | 1 (25.0)            | 1 (50.0)     | 0 (0)             |
| Alcohol abuse                              | 2 (16.7)  | 1 (20.0)       | 0 (0)               | 1 (50.0)     | 0 (0)             |
| NAFLD                                      | 5 (41.7)  | 3 (60.0)       | 2 (50.0)            | 0 (0)        | 0 (0)             |
| Vascular liver disease                     | 0 (0)     | 0 (0)          | 0 (0)               | 0 (0)        | 0 (0)             |
| Others                                     | 0 (0)     | 0 (0)          | 0 (0)               | 0 (0)        | 0 (0)             |
| No risk                                    | 1 (8.3)   | 0 (0)          | 0 (0)               | 0 (0)        | 1 (100)           |
| <b>Cirrhosis</b>                           | 3 (25.0)  | 1 (20.0)       | 1 (25.0)            | 1 (50.0)     | 0 (0)             |
| <b>LI-RADS high risk status</b>            | 7 (58.3)  | 3 (60.0)       | 2 (50.0)            | 2 (100)      | 0 (0)             |
| <b>AST (IU/L)</b>                          | 46.0      | 42.0           | 41.5                | 182.5        | 44.0              |
| <b>ALT (IU/L)</b>                          | 44.5      | 28.0           | 45.5                | 120.0        | 50.0              |
| <b>Albumin (g/L)</b>                       | 35.0      | 35.0           | 38.0                | 32.5         | 25.0              |
| <b>Creatinine (μmol/L)</b>                 | 87.5      | 93.0           | 82.5                | 63.5         | 78.0              |
| <b>Total bilirubin (mg/L)</b>              | 8.0       | 8.0            | 9.0                 | 27.0         | 6.0               |
| <b>Platelet count (x10<sup>3</sup>/μL)</b> | 228       | 272            | 175                 | 131          | 266               |
| <b>α-fetoprotein (ng/mL)</b>               | 193.0     | 647.0          | 7.0                 | NA           | NA                |
| <b>RFS (months)</b>                        | 19.5      | 4.0            | 46.5                | 58.5         | 2.0               |
| <b>Overall survival (months)</b>           | 39.5      | 37.0           | 46.5                | 58.5         | 15.0              |
| <i>Histopathological features</i>          |           |                |                     |              |                   |
| <b>HCC</b>                                 | 13        | 5              | 4                   | 2            | 2                 |
| <b>Edmonson-Steiner grade</b>              |           |                |                     |              |                   |
| I-II                                       | 3 (23.1)  | 4 (40.0)       | 1 (25.0)            | 0 (0)        | 0 (0)             |
| III-IV                                     | 10 (76.9) | 3 (60.0)       | 3 (75.0)            | 2 (100)      | 2 (100)           |
| <b>Macrovascular invasion</b>              | 1 (7.7)   | 1 (20.0)       | 0 (0)               | 0 (0)        | 0 (0)             |
| <b>Microvascular invasion</b>              | 8 (61.5)  | 4 (80.0)       | 1 (25.0)            | 2 (100)      | 1 (50.0)          |
| <b>Satellite nodules</b>                   | 5 (38.5)  | 3 (60.0)       | 0 (0)               | 0 (0)        | 2 (100)           |
| <b>Macroscopic capsule</b>                 | 8 (61.5)  | 3 (60.0)       | 3 (75.0)            | 0 (0)        | 2 (100)           |

|                               |          |          |          |          |         |
|-------------------------------|----------|----------|----------|----------|---------|
| <b>Microscopic capsule</b>    | 8 (61.5) | 3 (60.0) | 3 (75.0) | 0 (0)    | 2 (100) |
| <b>Hepatic steatosis</b>      |          |          |          |          |         |
| None                          | 0 (0)    | 0 (0)    | 0 (0)    | 0 (0)    | 0 (0)   |
| Mild                          | 3 (23.1) | 1 (20.0) | 2 (50.0) | 0 (0)    | 0 (0)   |
| Moderate                      | 0 (0)    | 0 (0)    | 0 (0)    | 0 (0)    | 0 (0)   |
| Severe                        | 0 (0)    | 0 (0)    | 0 (0)    | 0 (0)    | 0 (0)   |
| <b>Hepatic fibrosis stage</b> |          |          |          |          |         |
| F0                            | 7 (7.7)  | 1 (20.0) | 0 (0)    | 0 (0)    | 0 (0)   |
| F1                            | 3 (23.1) | 0 (0)    | 1 (25.0) | 0 (0)    | 2 (100) |
| F2                            | 3 (23.1) | 2 (40.0) | 1 (25.0) | 0 (0)    | 0 (0)   |
| F3                            | 3 (23.1) | 1 (20.0) | 1 (25.0) | 1 (50.0) | 0 (0)   |
| F4                            | 3 (23.1) | 1 (20.0) | 1 (25.0) | 1 (50.0) | 0 (0)   |

**Note.**—Continuous variables are expressed as medians, categorical variables are expressed as numbers and percentages in parenthesis.

\*More than one etiology could be present in each patient.

**Abbreviations:** ALT=alanine transaminase, AST=aspartate transaminase; HCC=hepatocellular carcinoma; NAFLD=nonalcoholic fatty liver disease; RFS=Recurrence-free survival.

**Table S2:** Differences in LI-RADS-defined ancillary features favoring malignancy, not HCC in particular and favoring HCC in particular, in non-otherwise specified (NOS), steatohepatitic (SH), and macrotrabecular-massive (MTM) hepatocellular carcinoma (HCC) subtypes in the entire cohort with contrast-enhanced CT ( $n=253$ ).

| Ancillary Features                                | NOS-HCC<br>( $n=175$ ) | SH-HCC<br>( $n=58$ ) | MTM-HCC<br>( $n=20$ ) | P value      | R1 vs R2<br>N agreement (%)<br>k value (95% CI) | R1 vs R3<br>N agreement (%)<br>k value (95% CI) | R2 vs R3<br>N agreement (%)<br>k value (95% CI) |
|---------------------------------------------------|------------------------|----------------------|-----------------------|--------------|-------------------------------------------------|-------------------------------------------------|-------------------------------------------------|
| <b>Favoring malignancy, not HCC in particular</b> |                        |                      |                       |              |                                                 |                                                 |                                                 |
| Subthreshold growth                               |                        |                      |                       |              |                                                 |                                                 |                                                 |
| Reader 1                                          | 40 (22.9)              | 13 (22.4)            | 4 (20.0)              | 0.959        | 199 (78.7)                                      | 202 (79.8)                                      | 192 (75.9)                                      |
| Reader 2                                          | 29 (16.6)              | 14 (24.1)            | 4 (20.0)              | 0.432        | 0.34 (0.21, 0.48)                               | 0.48 (0.36, 0.60)                               | 0.35 (0.23, 0.48)                               |
| Reader 3                                          | 47 (26.9)              | 23 (39.7)            | 6 (30.0)              | 0.183        |                                                 |                                                 |                                                 |
| Corona enhancement                                |                        |                      |                       |              |                                                 |                                                 |                                                 |
| Reader 1                                          | 6 (3.4)                | 2 (3.4)              | 0 (0)                 | 0.701        | 236 (93.3)                                      | 240 (94.9)                                      | 239 (94.5)                                      |
| Reader 2                                          | 10 (5.7)               | 3 (5.2)              | 0 (0)                 | 0.548        | 0.15 (-0.07, 0.38)                              | 0.10 (-0.13, 0.34)                              | 0.27 (0.008, 0.54)                              |
| Reader 3                                          | 5 (2.9)                | 1 (1.7)              | 1 (5.0)               | 0.737        |                                                 |                                                 |                                                 |
| Fat sparing in solid mass                         |                        |                      |                       |              |                                                 |                                                 |                                                 |
| Reader 1                                          | 2 (1.1)                | 3 (5.2)              | 0 (0)                 | 0.129        | 246 (97.2)                                      | 246 (97.2)                                      | 247 (97.6)                                      |
| Reader 2                                          | 1 (0.6)                | 5 (8.6)              | 0 (0)                 | <b>0.002</b> | 0.35 (-0.01, 0.71)                              | 0.20 (-0.15, 0.57)                              | 0.38 (0.00, 0.77)                               |
| Reader 3                                          | 1 (0.6)                | 3 (5.2)              | 0 (0)                 | <b>0.043</b> |                                                 |                                                 |                                                 |
| <b>Favoring malignancy, HCC in particular</b>     |                        |                      |                       |              |                                                 |                                                 |                                                 |
| Nonenhancing "capsule"                            |                        |                      |                       |              |                                                 |                                                 |                                                 |
| Reader 1                                          | 1 (0.6)                | 0 (0)                | 1 (5.0)               | 0.079        | 248 (98.0)                                      | 249 (98.4)                                      | 246 (97.2)                                      |

|                                       |           |           |           |                   |                    |                   |                    |
|---------------------------------------|-----------|-----------|-----------|-------------------|--------------------|-------------------|--------------------|
| Reader 2                              | 5 (2.9)   | 0 (0)     | 0 (0)     | 0.321             | 0.27 (-0.16, 0.71) | -0.007 (-0.01, -  | -0.01 (-0.02,      |
| Reader 3                              | 2 (1.1)   | 0 (0)     | 0 (0)     | 0.638             |                    | 0.0001)           | 0.0002)            |
| Nodule-in-nodule architecture         |           |           |           |                   |                    |                   |                    |
| Reader 1                              | 0 (0)     | 0 (0)     | 0 (0)     | 1.000             | 239 (92.9)         | 247 (97.6)        | 237 (93.7)         |
| Reader 2                              | 14 (8.0)  | 3 (5.2)   | 1 (5.0)   | 0.714             | 0.00 (0.00, 0.00)  | 0.00 (0.00, 0.00) | 0.30 (0.06, 0.55)  |
| Reader 3                              | 5 (2.9)   | 1 (1.7)   | 0 (0)     | 0.681             |                    |                   |                    |
| Mosaic architecture                   |           |           |           |                   |                    |                   |                    |
| Reader 1                              | 34 (19.4) | 13 (22.4) | 4 (20.0)  | 0.886             | 177 (70.0)         | 214 (84.6)        | 196 (80.2)         |
| Reader 2                              | 83 (47.4) | 25 (43.1) | 11 (55.5) | 0.644             | 0.37 (0.28, 0.47)  | 0.59 (0.47, 0.70) | 0.53 (0.44, 0.63)  |
| Reader 3                              | 53 (30.3) | 14 (24.1) | 7 (35.0)  | 0.565             |                    |                   |                    |
| Fat in mass, more than adjacent liver |           |           |           |                   |                    |                   |                    |
| Reader 1                              | 22 (12.6) | 19 (32.8) | 0 (0)     | <b>&lt; 0.001</b> | 205 (81.1)         | 224 (88.5)        | 196 (77.5)         |
| Reader 2                              | 39 (23.3) | 19 (32.8) | 3 (15.0)  | 0.166             | 0.41 (0.28, 0.55)  | 0.54 (0.40, 0.69) | 0.27 (0.133, 0.41) |
| Reader 3                              | 14 (8.0)  | 19 (32.8) | 1 (5.0)   | <b>&lt; 0.001</b> |                    |                   |                    |
| Blood products in mass                |           |           |           |                   |                    |                   |                    |
| Reader 1                              | 10 (5.7)  | 1 (1.7)   | 1 (5.0)   | 0.463             | 213 (84.2)         | 241 (95.3)        | 215 (85.0)         |
| Reader 2                              | 35 (20.0) | 9 (15.5)  | 2 (10.0)  | 0.457             | 0.25 (0.10, 0.40)  | 0.43 (0.16, 0.69) | 0.27 (0.12, 0.42)  |
| Reader 3                              | 7 (4.0)   | 3 (3.4)   | 1 (5.0)   | 0.952             |                    |                   |                    |

**Note.-** Categorical variables are expressed as numbers and percentages in parenthesis. Differences between HCC subtypes were assessed using the Pearson  $\chi^2$  test. Inter-reader agreement was assessed using the Cohen's kappa ( $k$ ) test. Statistically significant values ( $P < 0.05$ ) are highlighted in bold.

**Abbreviations:** CI=confidence interval; HCC=hepatocellular carcinoma; MTM-HCC=macrotrabecular massive hepatocellular carcinoma; NOS-HCC=not otherwise specified hepatocellular carcinoma; SH-HCC=steatohepatitic hepatocellular carcinoma.



**Table S3:** Differences in LI-RADS-defined TIV, LR-M features, and major features in non-otherwise specified (NOS), steatohepatic (SH), and macrotrabecular-massive (MTM) hepatocellular carcinoma (HCC) subtypes in high-risk patients with contrast-enhanced CT ( $n=134$ ).

| Features                               | NOS-HCC<br>( $n=88$ ) | SH-HCC<br>( $n=30$ ) | MTM-HCC<br>( $n=16$ ) | P value      | R1 vs R2<br>N agreement (%)<br><i>k</i> value (95% CI) | R1 vs R3<br>N agreement (%)<br><i>k</i> value (95% CI) | R2 vs R3<br>N agreement (%)<br><i>k</i> value (95% CI) |
|----------------------------------------|-----------------------|----------------------|-----------------------|--------------|--------------------------------------------------------|--------------------------------------------------------|--------------------------------------------------------|
| <b>TIV</b>                             |                       |                      |                       |              |                                                        |                                                        |                                                        |
| Reader 1                               | 4 (4.5)               | 0 (0)                | 3 (18.8)              | <b>0.022</b> | 124 (92.6)                                             | 129 (96.2)                                             | 123 (91.8)                                             |
| Reader 2                               | 10 (11.4)             | 1 (3.3)              | 4 (25.0)              | 0.085        | 0.51 (0.25, 0.76)                                      | 0.52 (0.16, 0.89)                                      | 0.39 (0.11, 0.66)                                      |
| Reader 3                               | 2 (2.3)               | 0 (0)                | 2 (12.5)              | <b>0.048</b> |                                                        |                                                        |                                                        |
| <b>LR-M features</b>                   |                       |                      |                       |              |                                                        |                                                        |                                                        |
| <b>At least one LR-M feature</b>       |                       |                      |                       |              |                                                        |                                                        |                                                        |
| Reader 1                               | 36 (40.9)             | 4 (13.3)             | 10 (62.5)             | <b>0.002</b> | 111 (82.9)                                             | 119 (88.8)                                             | 116 (86.6)                                             |
| Reader 2                               | 30 (34.1)             | 4 (13.3)             | 7 (43.8)              | <b>0.049</b> | 0.61 (0.48, 0.75)                                      | 0.74 (0.63, 0.86)                                      | 0.67 (0.53, 0.81)                                      |
| Reader 3                               | 25 (28.4)             | 4 (13.3)             | 8 (50.0)              | <b>0.029</b> |                                                        |                                                        |                                                        |
| <b>At least one targetoid features</b> |                       |                      |                       |              |                                                        |                                                        |                                                        |
| Reader 1                               | 10 (11.4)             | 0 (0)                | 3 (18.8)              | 0.082        | 122 (91.0)                                             | 125 (93.3)                                             | 123 (91.8)                                             |
| Reader 2                               | 2 (2.3)               | 1 (3.3)              | 0 (0)                 | 0.479        | 0.22 (-0.0, 0.49)                                      | 0.62 (0.40, 0.85)                                      | 0.32 (0.04, 0.61)                                      |
| Reader 3                               | 10 (11.4)             | 1 (3.3)              | 3 (18.8)              | 0.237        |                                                        |                                                        |                                                        |
| <b>Rim APHE</b>                        |                       |                      |                       |              |                                                        |                                                        |                                                        |
| Reader 1                               | 6 (6.8)               | 0 (0)                | 2 (12.5)              | 0.199        | 127 (94.8)                                             | 129 (96.3)                                             | 124 (92.5)                                             |
| Reader 2                               | 2 (2.3)               | 1 (3.3)              | 0 (0)                 | 0.767        | 0.34 (-0.02, 0.70)                                     | 0.74 (0.52, 0.95)                                      | 0.35 (0.05, 0.64)                                      |
| Reader 3                               | 9 (10.2)              | 1 (3.3)              | 3 (18.8)              | 0.233        |                                                        |                                                        |                                                        |
| <b>Peripheral “washout”</b>            |                       |                      |                       |              |                                                        |                                                        |                                                        |
| Reader 1                               | 1 (1.1)               | 0 (0)                | 0 (0)                 | 0.768        | 133 (99.3)                                             | 131 (97.7)                                             | 130 (97.0)                                             |

|                             |                   |                   |                     |              |                    |                    |                    |
|-----------------------------|-------------------|-------------------|---------------------|--------------|--------------------|--------------------|--------------------|
| Reader 2                    | 0 (0)             | 0 (0)             | 0 (0)               | 1.000        | 0.00 (0.00, 0.00)  | 0.39 (-0.14, 0.93) | 0.00 (0.00, 0.00)  |
| Reader 3                    | 3 (3.4)           | 0 (0)             | 1 (6.2)             | 0.457        |                    |                    |                    |
| Delayed central enhancement |                   |                   |                     |              |                    |                    |                    |
| Reader 1                    | 3 (3.4)           | 0 (0)             | 1 (6.2)             | 0.457        | 130 (97.0)         | 128 (95.5)         | 132 (98.5)         |
| Reader 2                    | 0 (0)             | 0 (0)             | 0 (0)               | 1.000        | 0.00 (0.00, 0.00)  | -0.02 (-0.04, -    | 0.00 (0.00, 0.00)  |
| Reader 3                    | 1 (1.1)           | 0 (0)             | 1 (6.2)             | 0.244        |                    | 0.0003)            |                    |
| Infiltrative appearance     |                   |                   |                     |              |                    |                    |                    |
| Reader 1                    | 10 (11.4)         | 0 (0)             | 4 (25.0)            | <b>0.027</b> | 127 (94.9)         | 124 (92.5)         | 125 (93.3)         |
| Reader 2                    | 9 (10.2)          | 1 (3.3)           | 1 (6.2)             | 0.472        | 0.69 (0.47, 0.90)  | 0.46 (0.19, 0.74)  | 0.43 (0.13, 0.74)  |
| Reader 3                    | 5 (5.7)           | 0 (0)             | 1 (6.2)             | 0.402        |                    |                    |                    |
| Necrosis or severe ischemia |                   |                   |                     |              |                    |                    |                    |
| Reader 1                    | 20 (22.7)         | 4 (13.3)          | 7 (43.8)            | 0.065        | 117 (87.3)         | 122 (91.0)         | 119 (88.8)         |
| Reader 2                    | 19 (21.6)         | 3 (10.0)          | 6 (37.5)            | 0.089        | 0.63 (0.47, 0.69)  | 0.73 (0.59, 0.87)  | 0.65 (0.49, 0.81)  |
| Reader 3                    | 16 (18.2)         | 4 (13.3)          | 7 (43.8)            | <b>0.037</b> |                    |                    |                    |
| <b>Major features</b>       |                   |                   |                     |              |                    |                    |                    |
| Size (mm)                   |                   |                   |                     |              |                    |                    |                    |
| Reader 1                    | 36.5 (21.0, 56.7) | 31.5 (15.0, 38.0) | 86.5 (33.2, 141.2)  | <b>0.003</b> | 0.98 (0.97, 0.98)* | 0.98 (0.97, 0.98)* | 0.98 (0.97, 0.98)* |
| Reader 2                    | 43.0 (25.0, 62.5) | 33.5 (21.2, 50.2) | 100.0 (36.2, 138.0) | <b>0.006</b> |                    |                    |                    |
| Reader 3                    | 36.0 (19.2, 57.2) | 32.0 (19.2, 47.2) | 93.0 (34.2, 142.0)  | <b>0.014</b> |                    |                    |                    |
| Nonrim APHE                 |                   |                   |                     |              |                    |                    |                    |
| Reader 1                    | 75 (85.2)         | 27 (90.0)         | 12 (75.0)           | 0.396        | 122 (91.0)         | 125 (93.3)         | 115 (85.9)         |
| Reader 2                    | 83 (94.3)         | 26 (86.7)         | 15 (93.8)           | 0.380        | 0.55 (0.33, 0.77)  | 0.77 (0.64, 0.91)  | 0.45 (0.26, 0.64)  |
| Reader 3                    | 70 (79.5)         | 24 (80.0)         | 11 (68.8)           | 0.609        |                    |                    |                    |
| Nonperipheral "washout"     |                   |                   |                     |              |                    |                    |                    |
| Reader 1                    | 79 (89.8)         | 25 (83.3)         | 16 (100)            | 0.211        | 122 (91.0)         | 116 (86.6)         | 112 (83.6)         |

|                     |           |           |           |       |                   |                    |                    |
|---------------------|-----------|-----------|-----------|-------|-------------------|--------------------|--------------------|
| Reader 2            | 80 (90.9) | 27 (90.0) | 15 (93.8) | 0.911 | 0.48 (0.24, 0.73) | 0.47 (0.28, 0.67)  | 0.34 (0.13, 0.54)  |
| Reader 3            | 69 (78.4) | 25 (83.3) | 14 (87.5) | 0.621 |                   |                    |                    |
| Enhancing “capsule” |           |           |           |       |                   |                    |                    |
| Reader 1            | 33 (37.5) | 16 (53.3) | 5 (31.2)  | 0.229 | 95 (70.9)         | 107 (79.9)         | 102 (76.1)         |
| Reader 2            | 46 (52.3) | 16 (53.3) | 11 (68.8) | 0.472 | 0.42 (0.28, 0.57) | 0.58 (0.53, 0.72)  | 0.53 (0.39, 0.66)  |
| Reader 3            | 32 (36.4) | 15 (50.0) | 6 (37.5)  | 0.412 |                   |                    |                    |
| Threshold growth    |           |           |           |       |                   |                    |                    |
| Reader 1            | 4 (4.5)   | 2 (6.7)   | 2 (12.5)  | 0.459 | 127 (94.7)        | 126 (94.0)         | 127 (94.7)         |
| Reader 2            | 4 (4.5)   | 0 (0)     | 1 (6.2)   | 0.448 | 0.43 (0.09, 0.78) | 0.30 (-0.04, 0.65) | 0.19 (-0.17, 0.56) |
| Reader 3            | 3 (3.4)   | 1 (3.3)   | 0 (0)     | 0.756 |                   |                    |                    |

**Note.-** Categorical variables are expressed as numbers and percentages in parenthesis. Continuous variable (size) is reported as median and interquartile range (25<sup>th</sup> to 75<sup>th</sup> percentile) in parenthesis. Differences between HCC subtypes were assessed using the Pearson  $\chi^2$  test for categorical variables. Inter-reader agreement was assessed using the Cohen’s kappa (*k*) test for categorical variables and using the intraclass correlation coefficient con continuous variable (size). Statistically significant values ( $P < 0.05$ ) are highlighted in bold.

\*Agreement assessed with intraclass correlation coefficient.

**Abbreviations:** APHE=arterial phase hyperenhancement; CI=confidence interval; MTM-HCC=macrotrabecular massive hepatocellular carcinoma; NOS-HCC=not otherwise specified hepatocellular carcinoma; SH-HCC=steatohepatic hepatocellular carcinoma; TIV=tumor-in-vein.

**Table S4:** Differences in LI-RADS-defined ancillary features favoring malignancy, not HCC in particular and favoring HCC in particular, in non-otherwise specified (NOS), steatohepatitic (SH), and macrotrabecular-massive (MTM) hepatocellular carcinoma (HCC) subtypes in high-risk patients with contrast-enhanced CT ( $n=134$ ).

| Ancillary features                                | NOS-HCC<br>( $n=88$ ) | SH-HCC<br>( $n=30$ ) | MTM-HCC<br>( $n=16$ ) | P value      | R1 vs R2<br>N agreement (%)<br>k value (95% CI) | R1 vs R3<br>N agreement (%)<br>k value (95% CI) | R2 vs R3<br>N agreement (%)<br>k value (95% CI) |
|---------------------------------------------------|-----------------------|----------------------|-----------------------|--------------|-------------------------------------------------|-------------------------------------------------|-------------------------------------------------|
| <b>Favoring malignancy, not HCC in particular</b> |                       |                      |                       |              |                                                 |                                                 |                                                 |
| Subthreshold growth                               |                       |                      |                       |              |                                                 |                                                 |                                                 |
| Reader 1                                          | 17 (19.3)             | 5 (16.7)             | 3 (18.8)              | 0.949        | 106 (79.1)                                      | 107 (79.9)                                      | 109 (81.3)                                      |
| Reader 2                                          | 12 (13.6)             | 10 (33.3)            | 3 (18.8)              | 0.057        | 0.31 (0.11, 0.51)                               | 0.43 (0.25, 0.60)                               | 0.47 (0.30, 0.64)                               |
| Reader 3                                          | 21 (23.9)             | 10 (33.3)            | 5 (31.2)              | 0.549        |                                                 |                                                 |                                                 |
| Corona enhancement                                |                       |                      |                       |              |                                                 |                                                 |                                                 |
| Reader 1                                          | 2 (2.3)               | 0 (0)                | 0 (0)                 | 0.588        | 125 (93.3)                                      | 127 (94.8)                                      | 126 (94.0)                                      |
| Reader 2                                          | 5 (5.7)               | 2 (6.7)              | 0 (0)                 | 0.593        | -0.02 (-0.05, -                                 | -0.02 (-0.04, -                                 | 0.30 (-0.05, 0.65)                              |
| Reader 3                                          | 3 (3.4)               | 1 (3.3)              | 1 (6.2)               | 0.852        | 0.002)                                          | 0.0006)                                         |                                                 |
| Fat sparing in solid mass                         |                       |                      |                       |              |                                                 |                                                 |                                                 |
| Reader 1                                          | 2 (2.3)               | 0 (0)                | 0 (0)                 | 0.588        | 129 (96.3)                                      | 130 (97.0)                                      | 131 (97.7)                                      |
| Reader 2                                          | 1 (1.1)               | 2 (6.7)              | 0 (0)                 | 0.170        | -0.01 (-0.03, -                                 | -0.01 (-0.03, -                                 | 0.38 (-0.16, 0.93)                              |
| Reader 3                                          | 1 (1.1)               | 1 (3.3)              | 0 (0)                 | 0.604        | 0.0009)                                         | 0.0003)                                         |                                                 |
| <b>Favoring malignancy, HCC in particular</b>     |                       |                      |                       |              |                                                 |                                                 |                                                 |
| Nonenhancing "capsule"                            |                       |                      |                       |              |                                                 |                                                 |                                                 |
| Reader 1                                          | 0 (0)                 | 0 (0)                | 1 (6.2)               | <b>0.024</b> | 131 (97.8)                                      | 131 (97.8)                                      | 130 (97.0)                                      |

|                                       |           |          |          |              |                    |                    |                   |
|---------------------------------------|-----------|----------|----------|--------------|--------------------|--------------------|-------------------|
| Reader 2                              | 2 (2.3)   | 0 (0)    | 0 (0)    | 0.588        | -0.01 (-0.02,      | -0.01 (-0.02,      | -0.01 (-0.02,     |
| Reader 3                              | 2 (2.3)   | 0 (0)    | 0 (0)    | 0.588        | 0.003)             | 0.003)             | -0.0003)          |
| Nodule-in-nodule architecture         |           |          |          |              |                    |                    |                   |
| Reader 1                              | 0 (0)     | 0 (0)    | 0 (0)    | 1.000        | 123 (91.8)         | 130 (97.0)         | 125 (93.2)        |
| Reader 2                              | 8 (9.1)   | 2 (6.7)  | 1 (6.2)  | 0.875        | 0.00 (0.00, 0.00)  | 0.00 (0.00, 0.00)  | 0.37 (0.05, 0.68) |
| Reader 3                              | 4 (4.5)   | 0 (0)    | 0 (0)    | 0.340        |                    |                    |                   |
| Mosaic architecture                   |           |          |          |              |                    |                    |                   |
| Reader 1                              | 8 (9.1)   | 4 (13.3) | 3 (18.8) | 0.485        | 97 (72.4)          | 120 (89.6)         | 105 (78.4)        |
| Reader 2                              | 32 (36.4) | 8 (26.7) | 8 (50.0) | 0.286        | 0.29 (0.14, 0.43)  | 0.57 (0.37, 0.77)  | 0.46 (0.31, 0.61) |
| Reader 3                              | 14 (15.9) | 4 (13.3) | 5 (31.2) | 0.267        |                    |                    |                   |
| Fat in mass, more than adjacent liver |           |          |          |              |                    |                    |                   |
| Reader 1                              | 8 (9.1)   | 9 (30.0) | 0 (0)    | <b>0.003</b> | 113 (84.3)         | 119 (88.8)         | 106 (79.1)        |
| Reader 2                              | 19 (21.6) | 9 (30.0) | 2 (12.5) | 0.380        | 0.46 (0.27, 0.65)  | 0.45 (0.22, 0.68)  | 0.25 (0.06, 0.45) |
| Reader 3                              | 5 (5.7)   | 8 (26.7) | 1 (6.2)  | <b>0.004</b> |                    |                    |                   |
| Blood products in mass                |           |          |          |              |                    |                    |                   |
| Reader 1                              | 3 (3.4)   | 0 (0)    | 0 (0)    | 0.488        | 118 (88.0)         | 128 (95.5)         | 122 (91.1)        |
| Reader 2                              | 10 (11.4) | 4 (13.3) | 1 (6.2)  | 0.766        | 0.07 (-0.11, 0.27) | 0.22 (-0.17, 0.63) | 0.36 (0.09, 0.63) |
| Reader 3                              | 2 (2.3)   | 2 (6.7)  | 1 (6.2)  | 0.467        |                    |                    |                   |

**Note.-** Categorical variables are expressed as numbers and percentages in parenthesis. Differences between HCC subtypes were assessed using the Pearson  $\chi^2$  test for categorical variables. Inter-reader agreement was assessed using the Cohen's kappa ( $k$ ). Statistically significant values ( $P < 0.05$ ) are highlighted in bold.

**Abbreviations:** CI=confidence interval; HCC=hepatocellular carcinoma; MTM-HCC=macrotrabecular massive hepatocellular carcinoma; NOS-HCC=not otherwise specified hepatocellular carcinoma; SH-HCC=steatohepatitic hepatocellular carcinoma.

**Table S5:** Differences in LI-RADS-defined ancillary features favoring malignancy, not HCC in particular and favoring HCC in particular, in non-otherwise specified (NOS), steatohepatic (SH), and macrotrabecular-massive (MTM) hepatocellular carcinoma (HCC) subtypes in the entire cohort with contrast-enhanced MRI ( $n=227$ ).

| Ancillary features                                | NOS-HCC<br>( $n=165$ ) | SH-HCC<br>( $n=48$ ) | MTM-HCC<br>( $n=14$ ) | P value      | R1 vs R2<br>N agreement (%)<br>k value (95% CI) | R1 vs R3<br>N agreement (%)<br>k value (95% CI) | R2 vs R3<br>N agreement (%)<br>k value (95% CI) |
|---------------------------------------------------|------------------------|----------------------|-----------------------|--------------|-------------------------------------------------|-------------------------------------------------|-------------------------------------------------|
| <b>Favoring malignancy, not HCC in particular</b> |                        |                      |                       |              |                                                 |                                                 |                                                 |
| Subthreshold growth                               |                        |                      |                       |              |                                                 |                                                 |                                                 |
| Reader 1                                          | 35 (21.2)              | 8 (16.7)             | 4 (28.6)              | 0.597        | 168 (74.0)                                      | 179 (78.9)                                      | 180 (79.3)                                      |
| Reader 2                                          | 21 (12.7)              | 11 (22.9)            | 2 (14.3)              | 0.219        | 0.18 (-0.02, 0.26)                              | 0.31 (0.16, 0.46)                               | 0.36 (0.21, 0.51)                               |
| Reader 3                                          | 33 (20.0)              | 13 (27.1)            | 3 (21.4)              | 0.576        |                                                 |                                                 |                                                 |
| Corona enhancement                                |                        |                      |                       |              |                                                 |                                                 |                                                 |
| Reader 1                                          | 7 (4.2)                | 1 (2.1)              | 0 (0)                 | 0.590        | 216 (95.1)                                      | 215 (94.7)                                      | 218 (96.0)                                      |
| Reader 2                                          | 7 (4.2)                | 2 (4.2)              | 0 (0)                 | 0.735        | 0.31 (0.02, 0.62)                               | 0.16 (-0.13, 0.37)                              | 0.38 (0.06, 0.70)                               |
| Reader 3                                          | 4 (2.4)                | 2 (4.2)              | 0 (0)                 | 0.562        |                                                 |                                                 |                                                 |
| Fat sparing in solid mass*                        |                        |                      |                       |              |                                                 |                                                 |                                                 |
| Reader 1                                          | 15 (9.3)               | 11 (22.9)            | 1 (7.1)               | <b>0.034</b> | 203 (91.0)                                      | 211 (94.6)                                      | 209 (93.7)                                      |
| Reader 2                                          | 18 (11.2)              | 8 (16.7)             | 1 (7.1)               | 0.499        | 0.59 (0.41, 0.75)                               | 0.68 (0.52, 0.85)                               | 0.63 (0.42, 0.80)                               |
| Reader 3                                          | 10 (6.2)               | 5 (10.4)             | 0 (0)                 | 0.347        |                                                 |                                                 |                                                 |
| Restricted diffusion <sup>†</sup>                 |                        |                      |                       |              |                                                 |                                                 |                                                 |
| Reader 1                                          | 127 (80.9)             | 38 (82.6)            | 13 (92.9)             | 0.532        | 175 (80.7)                                      | 187 (86.2)                                      | 183 (84.3)                                      |
| Reader 2                                          | 140 (89.2)             | 44 (95.7)            | 14 (100)              | 0.191        | 0.17 (0.02, 0.33)                               | 0.49 (0.33, 0.64)                               | 0.23 (0.05, 0.41)                               |
| Reader 3                                          | 134 (85.4)             | 38 (82.6)            | 14 (100)              | 0.258        |                                                 |                                                 |                                                 |

|                                               |            |           |          |       |                     |                     |                     |
|-----------------------------------------------|------------|-----------|----------|-------|---------------------|---------------------|---------------------|
| Mild-moderate T2 hyperintensity               |            |           |          |       |                     |                     |                     |
| Reader 1                                      | 144 (87.3) | 39 (81.2) | 14 (100) | 0.178 | 198 (87.2)          | 202 (89.0)          | 205 (90.3)          |
| Reader 2                                      | 157 (95.2) | 43 (89.6) | 14 (100) | 0.219 | 0.27 (0.08, 0.45)   | 0.46 (0.29, 0.64)   | 0.34 (0.13, 0.55)   |
| Reader 3                                      | 149 (90.3) | 41 (85.4) | 14 (100) | 0.265 |                     |                     |                     |
| Iron sparing in solid mass*                   |            |           |          |       |                     |                     |                     |
| Reader 1                                      | 3 (1.9)    | 1 (2.1)   | 0 (0)    | 0.868 | 207 (97.3)          | 220 (98.6)          | 218 (97.7)          |
| Reader 2                                      | 6 (3.7)    | 0 (0)     | 0 (0)    | 0.305 | 0.38 (-0.001,       | 0.66 (0.29, 1.00)   | 0.53 (0.17, 0.89)   |
| Reader 3                                      | 5 (3.1)    | 0 (0)     | 0 (0)    | 0.374 | 0.77)               |                     |                     |
| Hepatobiliary phase hypointensity             |            |           |          |       |                     |                     |                     |
| Reader 1 (adequate, n=59)                     | 39 (90.7)  | 11 (91.7) | 4 (100)  | 0.815 | 34 (87.2)           | 37 (94.9)           | 34 (87.2)           |
| Reader 2 (adequate, n=53)                     | 32 (84.2)  | 9 (90.0)  | 4 (80.0) | 0.849 | 0.38 (-0.04, 0.80)† | 0.48 (-0.12, 1.00)† | 0.25 (-0.15, 0.65)† |
| Reader 3 (adequate, n=55)                     | 40 (95.2)  | 9 (100)   | 4 (100)  | 0.725 |                     |                     |                     |
| <b>Favoring malignancy, HCC in particular</b> |            |           |          |       |                     |                     |                     |
| Nonenhancing "capsule"                        |            |           |          |       |                     |                     |                     |
| Reader 1                                      | 2 (1.2)    | 1 (2.1)   | 0 (0)    | 0.812 | 224 (98.6)          | 220 (96.9)          | 219 (96.5)          |
| Reader 2                                      | 1 (0.6)    | 1 (2.1)   | 0 (0)    | 0.588 | 0.39 (-0.15, 0.94)  | 0.20 (-0.15, 0.57)  | -0.01 (-0.02,       |
| Reader 3                                      | 5 (3.0)    | 1 (2.1)   | 0 (0)    | 0.765 |                     |                     | 0.008)              |
| Nodule-in-nodule architecture                 |            |           |          |       |                     |                     |                     |
| Reader 1                                      | 1 (0.6)    | 0 (0)     | 0 (0)    | 0.828 | 211 (93.0)          | 215 (94.7)          | 215 (94.7)          |
| Reader 2                                      | 11 (6.7)   | 4 (8.3)   | 0 (0)    | 0.543 | -0.008 (-0.02,      | 0.13 (-0.10, 0.37)  | 0.54 (0.31, 0.57)   |
| Reader 3                                      | 10 (6.1)   | 3 (6.2)   | 0 (0)    | 0.635 | 0.007)              |                     |                     |
| Mosaic architecture                           |            |           |          |       |                     |                     |                     |
| Reader 1                                      | 41 (24.8)  | 8 (16.7)  | 2 (14.3) | 0.367 | 161 (70.9)          | 201 (88.5)          | 175 (77.1)          |
| Reader 2                                      | 82 (49.7)  | 21 (43.8) | 8 (57.1) | 0.627 | 0.41 (0.31, 0.51)   | 0.70 (0.59, 0.80)   | 0.53 (0.43, 0.63)   |

|                                        |           |           |          |                   |                   |                   |                   |
|----------------------------------------|-----------|-----------|----------|-------------------|-------------------|-------------------|-------------------|
| Reader 3                               | 50 (30.3) | 11 (22.9) | 4 (28.6) | 0.609             |                   |                   |                   |
| Fat in mass, more than adjacent liver* |           |           |          |                   |                   |                   |                   |
| Reader 1                               | 38 (23.6) | 26 (54.2) | 2 (14.3) | <b>&lt; 0.001</b> | 175 (78.5)        | 186 (83.4)        | 182 (84.7)        |
| Reader 2                               | 51 (31.5) | 28 (58.3) | 7 (50.0) | <b>0.002</b>      | 0.52 (0.41, 0.64) | 0.60 (0.48, 0.71) | 0.59 (0.48, 0.70) |
| Reader 3                               | 35 (21.7) | 26 (54.2) | 4 (28.6) | <b>&lt; 0.001</b> |                   |                   |                   |
| Blood products in mass                 |           |           |          |                   |                   |                   |                   |
| Reader 1                               | 36 (21.8) | 5 (10.4)  | 2 (14.3) | 0.168             | 193 (85.1)        | 204 (89.9)        | 192 (84.6)        |
| Reader 2                               | 48 (29.1) | 11 (22.9) | 4 (28.6) | 0.701             | 0.58 (0.46, 0.70) | 0.63 (0.54, 0.79) | 0.57 (0.45, 0.69) |
| Reader 3                               | 33 (20.0) | 8 (16.7)  | 3 (21.4) | 0.859             |                   |                   |                   |

**Note.-** Categorical variables are expressed as numbers and percentages in parenthesis. Differences between categorical variables were assessed using the Pearson  $\chi^2$  test. Inter-reader agreement was assessed using the Cohen's kappa ( $k$ ) test. Statistically significant values ( $P < 0.05$ ) are highlighted in bold.

\*Features assessed in 223/227 observations due to the lack of in-phase and out-of-phase sequences in 4 observations.

†Feature assessed in 217/227 observations due to the lack of diffusion weighted imaging in 10 observations.

‡Agreement assessed only in observations considered with adequate hepatobiliary phase for all readers.

**Abbreviations:** CI=confidence interval; HCC=hepatocellular carcinoma; MTM-HCC=macrotrabecular massive hepatocellular carcinoma; NOS-HCC=not otherwise specified hepatocellular carcinoma; SH-HCC=steatohepatitic hepatocellular carcinoma.



**Table S6:** Differences in LI-RADS-defined TIV, LR-M features, and major features in non-otherwise specified (NOS), steatohepatic (SH), and macrotrabecular-massive (MTM) hepatocellular carcinoma (HCC) subtypes in high-risk patients with contrast-enhanced MRI (n=120).

| Features                               | NOS-HCC<br>(n=85) | SH-HCC<br>(n=25) | MTM-HCC<br>(n=10) | P value      | R1 vs R2<br>N agreement (%)<br>k value (95% CI) | R1 vs R3<br>N agreement (%)<br>k value (95% CI) | R2 vs R3<br>N agreement (%)<br>k value (95% CI) |
|----------------------------------------|-------------------|------------------|-------------------|--------------|-------------------------------------------------|-------------------------------------------------|-------------------------------------------------|
| <b>TIV</b>                             |                   |                  |                   |              |                                                 |                                                 |                                                 |
| Reader 1                               | 2 (2.4)           | 0 (0)            | 1 (10.0)          | 0.228        | 114 (95.0)                                      | 118 (98.4)                                      | 114 (95.0)                                      |
| Reader 2                               | 6 (7.1)           | 0 (0)            | 3 (30.0)          | <b>0.009</b> | 0.48 (0.13, 0.82)                               | 0.65 (0.21, 1.00)                               | 0.48 (0.13, 0.82)                               |
| Reader 3                               | 2 (2.4)           | 0 (0)            | 1 (10.0)          | 0.228        |                                                 |                                                 |                                                 |
| <b>LR-M features</b>                   |                   |                  |                   |              |                                                 |                                                 |                                                 |
| <b>At least one LR-M feature</b>       |                   |                  |                   |              |                                                 |                                                 |                                                 |
| Reader 1                               | 26 (30.6)         | 4 (16.0)         | 5 (50.0)          | 0.118        | 96 (80.0)                                       | 102 (85.0)                                      | 96 (83.4)                                       |
| Reader 2                               | 28 (32.9)         | 4 (16.0)         | 3 (30.0)          | 0.261        | 0.51 (0.34, 0.68)                               | 0.62 (0.46, 0.68)                               | 0.58 (0.42, 0.74)                               |
| Reader 3                               | 20 (23.5)         | 6 (24.0)         | 5 (50.0)          | 0.189        |                                                 |                                                 |                                                 |
| <b>At least one targetoid features</b> |                   |                  |                   |              |                                                 |                                                 |                                                 |
| Reader 1                               | 9 (10.6)          | 1 (4.0)          | 2 (20.0)          | 0.342        | 108 (90.0)                                      | 107 (89.2)                                      | 107 (89.2)                                      |
| Reader 2                               | 10 (11.8)         | 2 (8.0)          | 0 (0)             | 0.469        | 0.44 (0.18, 0.80)                               | 0.45 (0.21, 0.70)                               | 0.45 (0.21, 0.70)                               |
| Reader 3                               | 10 (11.8)         | 3 (12.0)         | 2 (20.0)          | 0.755        |                                                 |                                                 |                                                 |
| <b>Rim APHE</b>                        |                   |                  |                   |              |                                                 |                                                 |                                                 |
| Reader 1                               | 6 (7.1)           | 1 (4.0)          | 2 (20.0)          | 0.257        | 111 (92.5)                                      | 112 (93.3)                                      | 109 (90.8)                                      |
| Reader 2                               | 5 (5.9)           | 1 (4.0)          | 0 (0)             | 0.698        | 0.36 (0.03, 0.68)                               | 0.56 (0.26, 0.83)                               | 0.30 (0.007, 0.60)                              |
| Reader 3                               | 8 (9.4)           | 1 (4.0)          | 2 (20.0)          | 0.330        |                                                 |                                                 |                                                 |
| <b>Peripheral “washout”</b>            |                   |                  |                   |              |                                                 |                                                 |                                                 |
| Reader 1                               | 0 (0)             | 0 (0)            | 0 (0)             | 1.000        | 120 (100)                                       | 119 (99.2)                                      | 119 (99.2)                                      |

|                              |           |          |          |              |                       |                       |                       |
|------------------------------|-----------|----------|----------|--------------|-----------------------|-----------------------|-----------------------|
| Reader 2                     | 0 (0)     | 0 (0)    | 0 (0)    | 1.000        | NA**                  | 0.00 (0.00, 0.00)     | 0.00 (0.00, 0.00)     |
| Reader 3                     | 1 (1.2)   | 0 (0)    | 0 (0)    | 0.813        |                       |                       |                       |
| Delayed central enhancement  |           |          |          |              |                       |                       |                       |
| Reader 1                     | 5 (5.9)   | 0 (0)    | 0 (0)    | 0.342        | 115 (95.8)            | 116 (96.7)            | 115 (95.8)            |
| Reader 2                     | 4 (4.7)   | 0 (0)    | 0 (0)    | 0.427        | 0.42 (0.008, 0.83)    | 0.48 (0.05, 0.91)     | 0.26 (-0.18, 0.71)    |
| Reader 3                     | 2 (2.4)   | 1 (4.0)  | 0 (0)    | 0.781        |                       |                       |                       |
| Targetoid restriction*       |           |          |          |              |                       |                       |                       |
| Reader 1                     | 0 (0)     | 0 (0)    | 0 (0)    | 1.000        | 115 (100)             | 113 (98.3)            | 113 (98.3)            |
| Reader 2                     | 0 (0)     | 0 (0)    | 0 (0)    | 1.000        | NA**                  | 0.00 (0.00, 0.00)     | 0.00 (0.00, 0.00)     |
| Reader 3                     | 0 (0)     | 2 (8.3)  | 0 (0)    | <b>0.021</b> |                       |                       |                       |
| Targetoid appearance on HBP  |           |          |          |              |                       |                       |                       |
| Reader 1 (adequate, n=31)    | 0 (0)     | 0 (0)    | 0 (0)    | 1.000        | 19 (100) <sup>†</sup> | 19 (100) <sup>†</sup> | 19 (100) <sup>†</sup> |
| Reader 2 (adequate, n=27)    | 1 (5.9)   | 0 (0)    | 0 (0)    | 0.737        | NA**                  | NA**                  | NA**                  |
| Reader 3 (adequate, n=27)    | 0 (0)     | 0 (0)    | 0 (0)    | 1.000        |                       |                       |                       |
| Infiltrative appearance      |           |          |          |              |                       |                       |                       |
| Reader 1                     | 7 (8.2)   | 0 (0)    | 2 (20.0) | 0.114        | 114 (95.0)            | 113 (94.2)            | 117 (97.5)            |
| Reader 2                     | 6 (7.1)   | 0 (0)    | 1 (10.0) | 0.350        | 0.59 (0.30, 0.89)     | 0.43 (0.09, 0.77)     | 0.71 (0.41, 1.00)     |
| Reader 3                     | 4 (4.7)   | 0 (0)    | 0 (0)    | 0.427        |                       |                       |                       |
| Marked restricted diffusion* |           |          |          |              |                       |                       |                       |
| Reader 1                     | 3 (3.7)   | 0 (0)    | 2 (20.0) | 0.29         | 108 (93.9)            | 109 (94.7)            | 108 (93.9)            |
| Reader 2                     | 4 (4.9)   | 0 (0)    | 2 (20.0) | 0.056        | 0.33 (-0.04, 0.70)    | 0.37 (-0.02, 0.67)    | 0.33 (-0.04, 0.70)    |
| Reader 3                     | 3 (3.7)   | 0 (0)    | 2 (20.0) | <b>0.029</b> |                       |                       |                       |
| Necrosis or severe ischemia  |           |          |          |              |                       |                       |                       |
| Reader 1                     | 13 (15.3) | 4 (16.0) | 2 (20.0) | 0.928        | 106 (88.3)            | 111 (92.5)            | 111 (92.5)            |
| Reader 2                     | 10 (11.8) | 3 (12.0) | 2 (20.0) | 0.755        | 0.52 (0.30, 0.54)     | 0.66 (0.47, 0.86)     | 0.62 (0.40, 0.84)     |

|                         |                   |                   |                    |              |                                |                                |                                |
|-------------------------|-------------------|-------------------|--------------------|--------------|--------------------------------|--------------------------------|--------------------------------|
| Reader 3                | 7 (8.2)           | 3 (12.0)          | 2 (20.0)           | 0.469        |                                |                                |                                |
| <b>Major features</b>   |                   |                   |                    |              |                                |                                |                                |
| Size (mm)               |                   |                   |                    |              |                                |                                |                                |
| Reader 1                | 33.0 (21.5, 50.0) | 25.0 (16.0, 36.0) | 45.0 (26.0, 100.5) | 0.071        | 0.98 (0.97, 0.98) <sup>‡</sup> | 0.97 (0.96, 0.98) <sup>‡</sup> | 0.97 (0.96, 0.98) <sup>‡</sup> |
| Reader 2                | 43.0 (25.0, 59.5) | 30.0 (18.0, 42.0) | 48.0 (34.0, 130.0) | <b>0.048</b> |                                |                                |                                |
| Reader 3                | 36.0 (21.5, 52.0) | 25.0 (17.0, 41.0) | 48.0 (23.7, 124.7) | 0.092        |                                |                                |                                |
| Nonrim APHE             |                   |                   |                    |              |                                |                                |                                |
| Reader 1                | 72 (84.7)         | 24 (96.0)         | 8 (80.0)           | 0.279        | 109 (90.8)                     | 108 (90.0)                     | 99 (82.5)                      |
| Reader 2                | 77 (90.6)         | 24 (96.0)         | 10 (100)           | 0.427        | 0.51 (0.26, 0.76)              | 0.64 (0.46, 0.82)              | 0.28 (0.07, 0.49)              |
| Reader 3                | 67 (78.8)         | 22 (80.0)         | 7 (70.0)           | 0.428        |                                |                                |                                |
| Nonperipheral “washout” |                   |                   |                    |              |                                |                                |                                |
| Reader 1                | 76 (89.4)         | 19 (76.0)         | 10 (100)           | 0.940        | 109 (90.9)                     | 102 (85.0)                     | 97 (84.2)                      |
| Reader 2                | 77 (90.6)         | 21 (84.0)         | 10 (100)           | 0.342        | 0.54 (0.30, 0.78)              | 0.46 (0.26, 0.67)              | 0.40 (0.19, 0.61)              |
| Reader 3                | 66 (77.6)         | 20 (80.0)         | 9 (90.0)           | 0.657        |                                |                                |                                |
| Enhancing “capsule”     |                   |                   |                    |              |                                |                                |                                |
| Reader 1                | 58 (68.2)         | 17 (68.0)         | 7 (70.0)           | 0.993        | 95 (79.1)                      | 99 (82.5)                      | 92 (76.7)                      |
| Reader 2                | 55 (64.7)         | 15 (60.0)         | 7 (70.0)           | 0.841        | 0.53 (0.37, 0.69)              | 0.58 (0.44, 0.74)              | 0.46 (0.29, 0.63)              |
| Reader 3                | 63 (74.1)         | 16 (64.0)         | 8 (80.0)           | 0.522        |                                |                                |                                |
| Threshold growth        |                   |                   |                    |              |                                |                                |                                |
| Reader 1                | 0 (0)             | 0 (0)             | 0 (0)              | 1.000        | 118 (98.3)                     | 117 (97.5)                     | 117 (97.5)                     |
| Reader 2                | 1 (1.2)           | 0 (0)             | 1 (10.0)           | 0.091        | 0.00 (0.00, 0.00)              | 0.00 (0.00, 0.00)              | 0.38 (-0.16, 0.93)             |
| Reader 3                | 1 (1.2)           | 0 (0)             | 2 (20.0)           | <b>0.001</b> |                                |                                |                                |

**Note.-** Categorical variables are expressed as numbers and percentages in parenthesis. Continuous variable (size) is reported as median and interquartile range (25<sup>th</sup> to 75<sup>th</sup> percentile) in parenthesis. Differences between HCC subtypes were assessed using the Pearson  $\chi^2$  test for categorical variables. Inter-reader agreement was assessed using the Cohen’s kappa (*k*) test for categorical variables and intraclass correlation coefficient of continuous variable (size). Statistically significant values ( $P < 0.05$ ) are highlighted in bold.

\*Features assessed in 115/120 observations due to the lack of diffusion weighted imaging in 5 observations.

\*\*Not available since both readers never reported the feature.

†Agreement assessed only in observations considered with adequate HBP for all readers.

‡Agreement assessed with intraclass correlation coefficient.

**Abbreviations:** APHE=arterial phase hyperenhancement; CI=confidence interval; HBP=hepatobiliary phase; HCC=hepatocellular carcinoma; MTM-HCC=macrotrabecular massive hepatocellular carcinoma; NOS-HCC=not otherwise specified hepatocellular carcinoma; SH-HCC=steatohepatitic hepatocellular carcinoma; TIV=tumor-in-vein.

**Table S7:** Differences in LI-RADS-defined ancillary features favoring malignancy, not HCC in particular and favoring HCC in particular in non-otherwise specified (NOS), steatohepatic (SH), and macrotrabecular-massive (MTM) hepatocellular carcinoma (HCC) subtypes in high-risk patients with contrast-enhanced MRI ( $n=120$ ).

| Ancillary features                                | NOS-HCC<br>( $n=85$ ) | SH-HCC<br>( $n=25$ ) | MTM-HCC<br>( $n=10$ ) | P value | R1 vs R2<br>N agreement (%)<br>k value (95% CI) | R1 vs R3<br>N agreement (%)<br>k value (95% CI) | R2 vs R3<br>N agreement (%)<br>k value (95% CI) |
|---------------------------------------------------|-----------------------|----------------------|-----------------------|---------|-------------------------------------------------|-------------------------------------------------|-------------------------------------------------|
| <b>Favoring malignancy, not HCC in particular</b> |                       |                      |                       |         |                                                 |                                                 |                                                 |
| Subthreshold growth                               |                       |                      |                       |         |                                                 |                                                 |                                                 |
| Reader 1                                          | 16 (18.8)             | 2 (8.0)              | 3 (30.0)              | 0.253   | 93 (77.5)                                       | 93 (77.5)                                       | 98 (81.7)                                       |
| Reader 2                                          | 10 (11.8)             | 5 (20.0)             | 1 (10.0)              | 0.538   | 0.14 (-0.06, 0.34)                              | 0.26 (0.05, 0.47)                               | 0.34 (0.13, 0.55)                               |
| Reader 3                                          | 17 (20.0)             | 5 (20.0)             | 2 (20.0)              | 1.000   |                                                 |                                                 |                                                 |
| Corona enhancement                                |                       |                      |                       |         |                                                 |                                                 |                                                 |
| Reader 1                                          | 3 (3.5)               | 0 (0)                | 0 (0)                 | 0.531   | 114 (95.0)                                      | 115 (95.8)                                      | 115 (95.8)                                      |
| Reader 2                                          | 4 (4.7)               | 1 (4.0)              | 0 (0)                 | 0.779   | 0.26 (-0.17, 0.62)                              | 0.26 (-0.18, 0.71)                              | 0.42 (0.008, 0.83)                              |
| Reader 3                                          | 4 (4.7)               | 0 (0)                | 0 (0)                 | 0.427   |                                                 |                                                 |                                                 |
| Fat sparing in solid mass*                        |                       |                      |                       |         |                                                 |                                                 |                                                 |
| Reader 1                                          | 10 (11.9)             | 5 (20.0)             | 0 (0)                 | 0.257   | 111 (93.3)                                      | 113 (95.0)                                      | 115 (96.7)                                      |
| Reader 2                                          | 8 (9.5)               | 4 (16.0)             | 1 (10.0)              | 0.657   | 0.67 (0.46, 0.88)                               | 0.74 (0.51, 0.93)                               | 0.80 (0.61, 0.98)                               |
| Reader 3                                          | 7 (8.3)               | 2 (8.0)              | 0 (0)                 | 0.639   |                                                 |                                                 |                                                 |
| Restricted diffusion <sup>†</sup>                 |                       |                      |                       |         |                                                 |                                                 |                                                 |
| Reader 1                                          | 60 (71.4)             | 19 (79.2)            | 10 (100)              | 0.176   | 90 (78.2)                                       | 100 (86.9)                                      | 97 (84.3)                                       |
| Reader 2                                          | 74 (91.4)             | 22 (91.7)            | 10 (100)              | 0.627   | 0.19 (-0.004,                                   | 0.58 (0.40, 0.73)                               | 0.28 (0.04, 0.51)                               |
| Reader 3                                          | 67 (82.7)             | 19 (79.2)            | 10 (100)              | 0.311   | 0.38)                                           |                                                 |                                                 |

|                                               |           |           |          |       |                                |                       |                                |
|-----------------------------------------------|-----------|-----------|----------|-------|--------------------------------|-----------------------|--------------------------------|
| Mild-moderate T2 hyperintensity               |           |           |          |       |                                |                       |                                |
| Reader 1                                      | 68 (80.0) | 18 (72.0) | 10 (100) | 0.174 | 99 (82.5)                      | 104 (86.7)            | 109 (90.8)                     |
| Reader 2                                      | 80 (94.1) | 21 (84.0) | 10 (100) | 0.155 | 0.28 (0.07, 0.49)              | 0.50 (0.30, 0.51)     | 0.47 (0.21, 0.73)              |
| Reader 3                                      | 77 (90.6) | 19 (76.0) | 10 (100) | 0.066 |                                |                       |                                |
| Iron sparing in solid mass*                   |           |           |          |       |                                |                       |                                |
| Reader 1                                      | 0 (0)     | 0 (0)     | 0 (0)    | 1.000 | 117 (98.3)                     | 117 (98.3)            | 117 (98.3)                     |
| Reader 2                                      | 2 (2.4)   | 0 (0)     | 0 (0)    | 0.844 | 0.00 (0.00, 0.00)              | 0.00 (0.00, 0.00)     | 0.49 (-0.16, 1.00)             |
| Reader 3                                      | 2 (2.4)   | 0 (0)     | 0 (0)    | 0.655 |                                |                       |                                |
| Hepatobiliary phase hypointensity             |           |           |          |       |                                |                       |                                |
| Reader 1 (adequate, n=31)                     | 19 (95.0) | 7 (100)   | 4 (100)  | 0.753 | 17 (89.5)                      | 19 (100) <sup>‡</sup> | 17 (89.5)                      |
| Reader 2 (adequate, n=27)                     | 15 (88.2) | 4 (80.0)  | 4 (80.0) | 0.830 | 0.00 (0.00, 0.00) <sup>‡</sup> | NA**                  | 0.00 (0.00, 0.00) <sup>‡</sup> |
| Reader 3 (adequate, n=27)                     | 17 (94.4) | 5 (100)   | 4 (100)  | 0.771 |                                |                       |                                |
| <b>Favoring malignancy, HCC in particular</b> |           |           |          |       |                                |                       |                                |
| Nonenhancing "capsule"                        |           |           |          |       |                                |                       |                                |
| Reader 1                                      | 1 (1.2)   | 0 (0)     | 0 (0)    | 0.813 | 118 (98.3)                     | 117 (97.5)            | 115 (95.8)                     |
| Reader 2                                      | 1 (1.2)   | 0 (0)     | 0 (0)    | 0.813 | -0.008 (-0.02, 0.003)          | 0.39 (-0.14, 0.93)    | -0.01 (-0.03, 0.007)           |
| Reader 3                                      | 3 (3.5)   | 1 (4.0)   | 0 (0)    | 0.823 |                                |                       |                                |
| Nodule-in-nodule architecture                 |           |           |          |       |                                |                       |                                |
| Reader 1                                      | 0 (0)     | 0 (0)     | 0 (0)    | 1.000 | 109 (90.8)                     | 111 (92.5)            | 114 (95.0)                     |
| Reader 2                                      | 8 (9.4)   | 3 (12.0)  | 0 (0)    | 0.534 | 0.00 (0.00, 0.00)              | 0.00 (0.00, 0.00)     | 0.67 (0.42, 0.91)              |
| Reader 3                                      | 6 (7.1)   | 3 (12.0)  | 0 (0)    | 0.457 |                                |                       |                                |
| Mosaic architecture                           |           |           |          |       |                                |                       |                                |
| Reader 1                                      | 11 (12.9) | 2 (8.0)   | 2 (20.0) | 0.609 | 89 (74.2)                      | 112 (93.3)            | 93 (77.5)                      |
| Reader 2                                      | 32 (37.6) | 9 (36.0)  | 5 (50.0) | 0.722 | 0.37 (0.22, 0.52)              | 0.72 (0.54, 0.90)     | 0.46 (0.31, 0.61)              |

|                                        |           |           |          |              |                   |                   |                   |
|----------------------------------------|-----------|-----------|----------|--------------|-------------------|-------------------|-------------------|
| Reader 3                               | 13 (15.3) | 3 (12.0)  | 3 (30.0) | 0.407        |                   |                   |                   |
| Fat in mass, more than adjacent liver* |           |           |          |              |                   |                   |                   |
| Reader 1                               | 17 (20.2) | 12 (48.0) | 1 (10.0) | <b>0.010</b> | 94 (79.0)         | 101 (84.8)        | 100 (84.0)        |
| Reader 2                               | 11 (25.9) | 13 (52.0) | 4 (40.0) | <b>0.043</b> | 0.49 (0.32, 0.66) | 0.59 (0.43, 0.76) | 0.61 (0.46, 0.76) |
| Reader 3                               | 35 (21.7) | 26 (54.2) | 4 (40.0) | <b>0.013</b> |                   |                   |                   |
| Blood products in mass                 |           |           |          |              |                   |                   |                   |
| Reader 1                               | 11 (12.9) | 3 (12.0)  | 2 (20.0) | 0.805        | 106 (88.3)        | 115 (95.8)        | 105 (87.5=        |
| Reader 2                               | 18 (21.2) | 4 (16.0)  | 2 (20.0) | 0.851        | 0.58 (0.39, 0.77) | 0.81 (0.65, 0.97) | 0.54 (0.34, 0.74) |
| Reader 3                               | 11 (12.9) | 3 (12.0)  | 1 (10.0) | 0.962        |                   |                   |                   |

**Note.-** Categorical variables are expressed as numbers and percentages in parenthesis. Differences between categorical variables were assessed using the Pearson  $\chi^2$  test. Inter-reader agreement was assessed using the Cohen's kappa ( $k$ ) test. Statistically significant values ( $P < 0.05$ ) are highlighted in bold.

\*Features assessed in 119/120 observations due to the lack of in-phase and out-of-phase sequences in 4 observations.

†Feature assessed in 115/120 observations due to the lack of diffusion weighted imaging in 5 observations.

‡Agreement assessed only in observations considered with adequate hepatobiliary phase for all readers.

\*\*Agreement not assessed because it was a constant.

**Abbreviations:** CI=confidence interval; HCC=hepatocellular carcinoma; MTM-HCC=macrotrabecular massive hepatocellular carcinoma; NOS-HCC=not otherwise specified hepatocellular carcinoma; SH-HCC=steatohepatitic hepatocellular carcinoma.

**Table S8:** Differences in LI-RADS-defined TIV, LR-M features, major features, and ancillary features favoring malignancy in other hepatocellular carcinoma (HCC) subtypes in the entire cohort with contrast-enhanced CT ( $n=9$ ) or MRI ( $n=10$ ).

|                                | CT ( $n=9$ ) | MRI ( $n=10$ ) |
|--------------------------------|--------------|----------------|
| <b>TIV</b>                     |              |                |
| Reader 1                       | 1 (11.1)     | 1 (10.0)       |
| Reader 2                       | 1 (11.1)     | 1 (10.0)       |
| Reader 3                       | 1 (11.1)     | 1 (10.0)       |
| <b>LR-M features</b>           |              |                |
| At least one LR-M feature      |              |                |
| Reader 1                       | 7 (77.8)     | 6 (60.0)       |
| Reader 2                       | 6 (66.7)     | 5 (50.0)       |
| Reader 3                       | 6 (66.7)     | 6 (60.0)       |
| At least one targetoid feature |              |                |
| Reader 1                       | 2 (22.2)     | 2 (20.0)       |
| Reader 2                       | 1 (11.1)     | 1 (10.0)       |
| Reader 3                       | 1 (11.1)     | 1 (10.0)       |
| Rim APHE                       |              |                |
| Reader 1                       | 2 (22.2)     | 1 (10.0)       |
| Reader 2                       | 1 (11.1)     | 1 (10.0)       |
| Reader 3                       | 1 (11.1)     | 1 (10.0)       |
| Peripheral “washout”           |              |                |
| Reader 1                       | 0 (0)        | 0 (0)          |
| Reader 2                       | 0 (0)        | 0 (0)          |
| Reader 3                       | 0 (0)        | 0 (0)          |
| Delayed central enhancement    |              |                |
| Reader 1                       | 1 (11.1)     | 1 (10.0)       |
| Reader 2                       | 1 (11.1)     | 1 (10.0)       |
| Reader 3                       | 1 (11.1)     | 1 (10.0)       |
| Targetoid restriction          |              |                |
| Reader 1                       | -            | 2 (20.0)       |
| Reader 2                       | -            | 1 (10.0)       |
| Reader 3                       | -            | 1 (10.0)       |
| Targetoid appearance on HBP    |              |                |
| Reader 1 (adequate, $n=3$ )    | -            | 1 (33.3)       |
| Reader 2 (adequate, $n=3$ )    | -            | 0 (0)          |



|                                                                      |                    |                    |
|----------------------------------------------------------------------|--------------------|--------------------|
| Reader 3 (adequate, n=3)                                             | -                  | 0 (0)              |
| Infiltrative appearance                                              |                    |                    |
| Reader 1                                                             | 1 (11.1)           | 1 (10.0)           |
| Reader 2                                                             | 1 (11.1)           | 1 (10.0)           |
| Reader 3                                                             | 1 (11.1)           | 1 (10.0)           |
| Marked restricted diffusion                                          |                    |                    |
| Reader 1                                                             | -                  | 0 (0)              |
| Reader 2                                                             | -                  | 0 (0)              |
| Reader 3                                                             | -                  | 2 (20.0)           |
| Necrosis or severe ischemia                                          |                    |                    |
| Reader 1                                                             | 4 (44.4)           | 3 (30.0)           |
| Reader 2                                                             | 4 (44.4)           | 3 (30.0)           |
| Reader 3                                                             | 4 (44.4)           | 3 (30.0)           |
| <b>Major features</b>                                                |                    |                    |
| Size (mm)                                                            |                    |                    |
| Reader 1                                                             | 61.0 (31.5, 112.0) | 31.5 (24.5, 98.5)  |
| Reader 2                                                             | 70.0 (33.5, 120.5) | 37.5 (32.0, 119.5) |
| Reader 3                                                             | 45.0 (32.5, 114.0) | 31.0 (27.5, 107.2) |
| Nonrim APHE                                                          |                    |                    |
| Reader 1                                                             | 6 (66.7)           | 8 (80.0)           |
| Reader 2                                                             | 8 (88.9)           | 9 (90.0)           |
| Reader 3                                                             | 7 (77.8)           | 8 (80.0)           |
| Nonperipheral "washout"                                              |                    |                    |
| Reader 1                                                             | 8 (88.9)           | 8 (80.0)           |
| Reader 2                                                             | 9 (100)            | 9 (90.0)           |
| Reader 3                                                             | 8 (88.9)           | 8 (80.0)           |
| Enhancing "capsule"                                                  |                    |                    |
| Reader 1                                                             | 5 (55.6)           | 7 (70.0)           |
| Reader 2                                                             | 7 (77.8)           | 7 (70.0)           |
| Reader 3                                                             | 6 (66.7)           | 7 (70.0)           |
| Threshold growth                                                     |                    |                    |
| Reader 1                                                             | 0 (0)              | 0 (0)              |
| Reader 2                                                             | 0 (0)              | 0 (0)              |
| Reader 3                                                             | 1 (11.1)           | 1 (10.0)           |
| <b>Ancillary features favoring malignancy, not HCC in particular</b> |                    |                    |
| Subthreshold growth                                                  |                    |                    |
| Reader 1                                                             | 4 (44.4)           | 3 (30.0)           |

|                                                                  |          |          |
|------------------------------------------------------------------|----------|----------|
| Reader 2                                                         | 0 (0)    | 0 (0)    |
| Reader 3                                                         | 3 (33.3) | 2 (20.0) |
| Corona enhancement                                               |          |          |
| Reader 1                                                         | 0 (0)    | 0 (0)    |
| Reader 2                                                         | 1 (11.1) | 1 (10.0) |
| Reader 3                                                         | 2 (22.2) | 2 (20.0) |
| Fat sparing in solid mass                                        |          |          |
| Reader 1                                                         | 0 (0)    | 0 (0)    |
| Reader 2                                                         | 0 (0)    | 0 (0)    |
| Reader 3                                                         | 0 (0)    | 0 (0)    |
| Restricted diffusion                                             |          |          |
| Reader 1                                                         | -        | 9 (90.0) |
| Reader 2                                                         | -        | 10 (100) |
| Reader 3                                                         | -        | 9 (90.0) |
| Mild-moderate T2 hyperintensity                                  |          |          |
| Reader 1                                                         | -        | 10 (100) |
| Reader 2                                                         | -        | 10 (100) |
| Reader 3                                                         | -        | 10 (100) |
| Iron sparing in solid mass                                       |          |          |
| Reader 1                                                         | -        | 0 (0)    |
| Reader 2                                                         | -        | 0 (0)    |
| Reader 3                                                         | -        | 0 (0)    |
| Hepatobiliary phase hypointensity                                |          |          |
| Reader 1 (adequate, n=3)                                         | -        | 3 (100)  |
| Reader 2 (adequate, n=3)                                         | -        | 3 (100)  |
| Reader 3 (adequate, n=3)                                         | -        | 3 (100)  |
| <b>Ancillary features favoring malignancy, HCC in particular</b> |          |          |
| Nonenhancing "capsule"                                           |          |          |
| Reader 1                                                         | 0 (0)    | 0 (0)    |
| Reader 2                                                         | 0 (0)    | 0 (0)    |
| Reader 3                                                         | 0 (0)    | 0 (0)    |
| Nodule-in-nodule architecture                                    |          |          |
| Reader 1                                                         | 0 (0)    | 0 (0)    |
| Reader 2                                                         | 0 (0)    | 0 (0)    |
| Reader 3                                                         | 0 (0)    | 0 (0)    |
| Mosaic architecture                                              |          |          |
| Reader 1                                                         | 3 (33.3) | 3 (30.0) |

|                                       |          |          |
|---------------------------------------|----------|----------|
| Reader 2                              | 6 (66.7) | 5 (50.0) |
| Reader 3                              | 3 (33.3) | 3 (30.0) |
| Fat in mass, more than adjacent liver |          |          |
| Reader 1                              | 0 (0)    | 0 (0)    |
| Reader 2                              | 1 (11.1) | 4 (40.0) |
| Reader 3                              | 0 (0)    | 0 (0)    |
| Blood products in mass                |          |          |
| Reader 1                              | 1 (11.1) | 2 (20.0) |
| Reader 2                              | 2 (22.2) | 3 (30.0) |
| Reader 3                              | 0 (0)    | 2 (20.0) |

**Note.-** Categorical variables are expressed as numbers and percentages in parenthesis. Continuous variable (size) is reported as median and interquartile range (25<sup>th</sup> to 75<sup>th</sup> percentile) in parenthesis.

**Abbreviations:** APHE=arterial phase hyperenhancement; HBP=hepatobiliary phase; HCC=hepatocellular carcinoma.

**Table S9:** LI-RADS categories using major features only and after final adjustment for ancillary features in other hepatocellular carcinoma (HCC) subtypes high-risk patients with contrast-enhanced CT ( $n=3$ ) or MRI ( $n=7$ ).

|                                                             | CT ( $n=3$ ) | MRI ( $n=7$ ) |
|-------------------------------------------------------------|--------------|---------------|
| <b>LI-RADS categories with major features only</b>          |              |               |
| Reader 1                                                    |              |               |
| LR-3                                                        | 0 (0)        | 0 (0)         |
| LR-4                                                        | 0 (0)        | 2 (28.6)      |
| LR-5                                                        | 1 (33.3)     | 3 (42.9)      |
| LR-M                                                        | 1 (33.3)     | 1 (14.3)      |
| LR-TIV                                                      | 1 (33.3)     | 1 (14.3)      |
| Reader 2                                                    |              |               |
| LR-3                                                        | 0 (0)        | 0 (0)         |
| LR-4                                                        | 0 (0)        | 1 (14.3)      |
| LR-5                                                        | 1 (33.3)     | 4 (57.1)      |
| LR-M                                                        | 1 (33.3)     | 1 (14.3)      |
| LR-TIV                                                      | 1 (33.3)     | 1 (13.3)      |
| Reader 3                                                    |              |               |
| LR-3                                                        | 0 (0)        | 0 (0)         |
| LR-4                                                        | 0 (0)        | 1 (14.3)      |
| LR-5                                                        | 1 (33.3)     | 3 (42.9)      |
| LR-M                                                        | 1 (33.3)     | 2 (28.6)      |
| LR-TIV                                                      | 1 (33.3)     | 1 (13.3)      |
| <b>LI-RADS categories with major and ancillary features</b> |              |               |
| Reader 1                                                    |              |               |
| LR-3                                                        | 0 (0)        | 0 (0)         |
| LR-4                                                        | 0 (0)        | 2 (28.6)      |
| LR-5                                                        | 1 (33.3)     | 3 (42.9)      |
| LR-M                                                        | 1 (33.3)     | 1 (14.3)      |
| LR-TIV                                                      | 1 (33.3)     | 1 (14.3)      |
| Reader 2                                                    |              |               |
| LR-3                                                        | 0 (0)        | 0 (0)         |
| LR-4                                                        | 0 (0)        | 1 (14.3)      |
| LR-5                                                        | 1 (33.3)     | 4 (57.1)      |
| LR-M                                                        | 1 (33.3)     | 1 (14.3)      |
| LR-TIV                                                      | 1 (33.3)     | 1 (14.3)      |

|          |          |          |
|----------|----------|----------|
| Reader 3 |          |          |
| LR-3     | 0 (0)    | 0 (0)    |
| LR-4     | 0 (0)    | 1 (14.3) |
| LR-5     | 1 (33.3) | 3 (42.9) |
| LR-M     | 1 (33.3) | 2 (28.6) |
| LR-TIV   | 1 (33.3) | 1 (13.3) |

**Abbreviation:** TIV=tumor-in-vein.
